# Supplementary material
Source: PubMed Central journal article supplement (PMC3631659)
Supplement: 1303932110_pnas.201303932SI.pdf [file 1303932110_pnas.201303932SI.pdf]

# Supporting Information

Osborne et al. 10.1073/pnas.1303932110

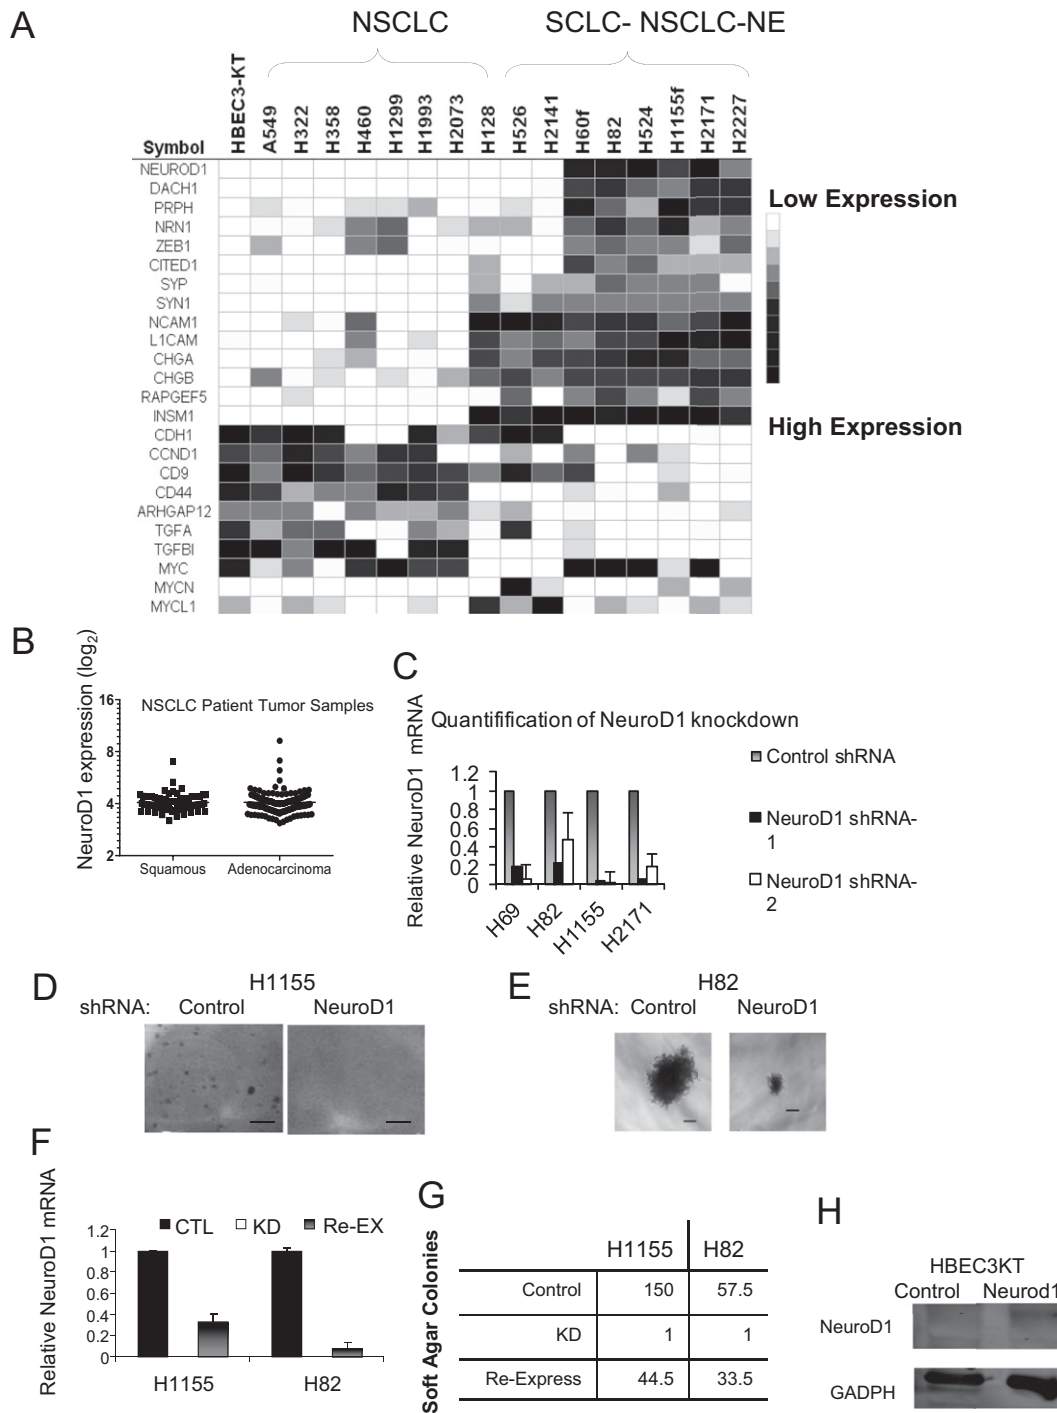

**Fig. S1.** Neurogenic differentiation 1 (NeuroD1) microarray and functional assay (associated with Fig. 1). (A) mRNA expression was analyzed in human bronchial epithelial cell (HBEC), non-small-cell lung cancer (NSCLC), and small-cell lung cancer (SCLC) using Affymetrix HG-U133A and B GeneChips. (A and B) mRNA expression in 275 NSCLC lung cancer patient samples assessed using Illumina BeadChip HumanWG-6 V3. (C) The stable cell lines created and tested in this figure were used throughout the paper in experiments using NeuroD1 knockdown. RNA was extracted from cells, reverse transcribed to cDNA, and used for quantitative RT-PCR (qRT-PCR) to quantitate knockdown efficiency. Subsequent studies used shRNA-2 unless otherwise stated. (D and E) Formation of colonies in soft agar by H1155 and H82 cells in which NeuroD1 was stably knocked down was measured. Pictures are at 4 $\times$  (H1155) and 10 $\times$  (H82) magnification. (F) Cells as in D and E were transiently transfected with a plasmid encoding mouse NeuroD1. Expression was confirmed by mRNA analysis (Left). (G) Quantitation of panel F. (H) Overexpression of NeuroD1 in HBEC3KT (See Fig. 1 F and G).



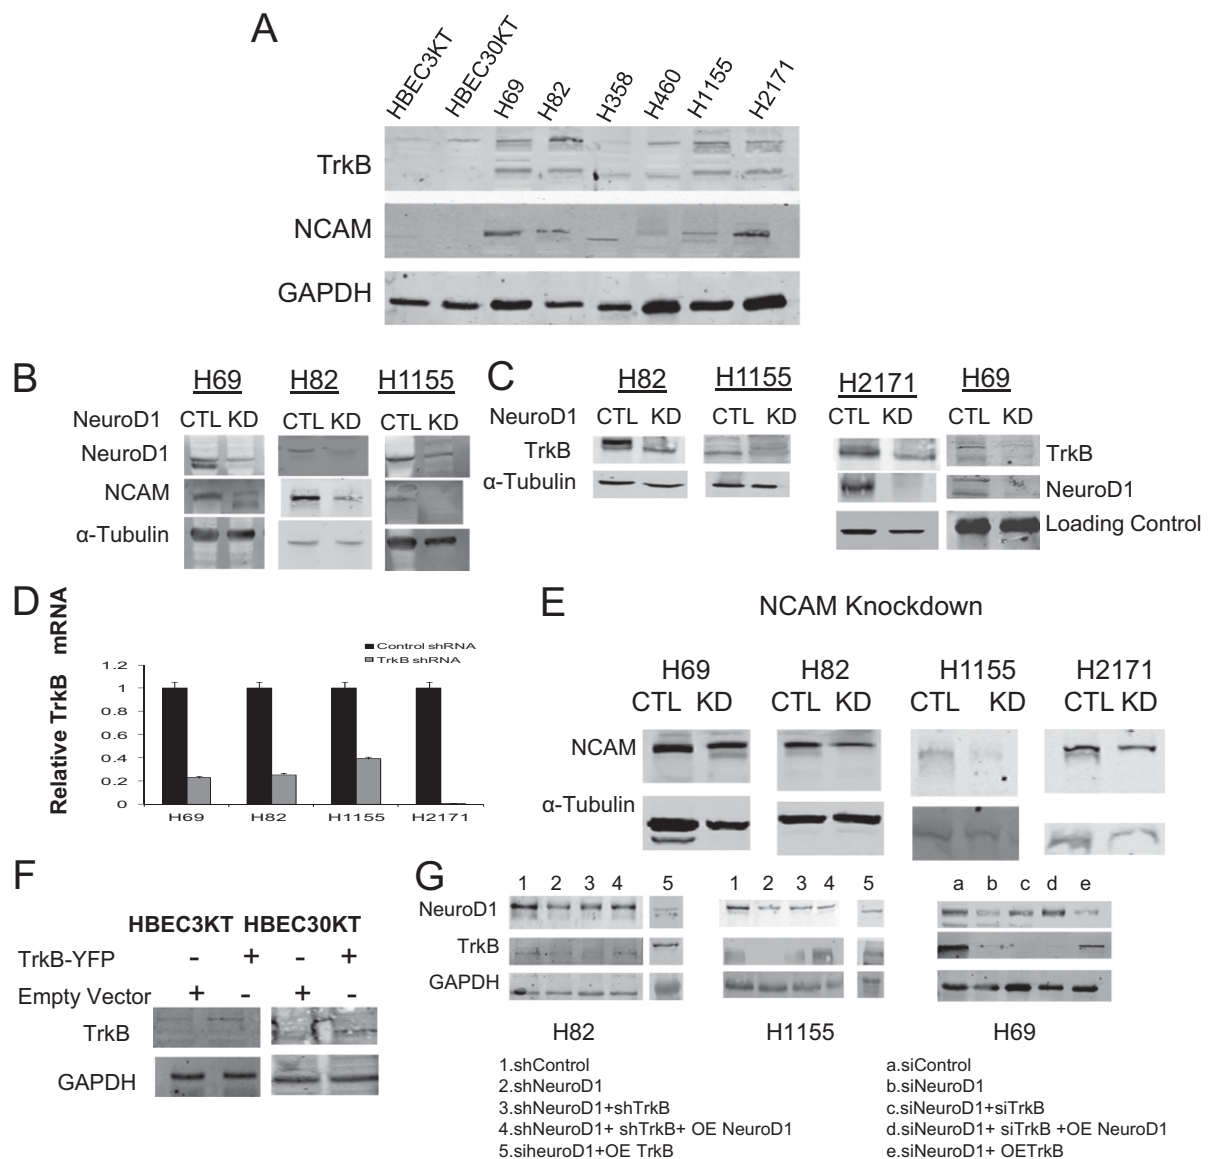

**Fig. S3.** Studies of neural cell adhesion molecule (NCAM) and tropomyosin-related kinase B (TrkB) (associated with Fig. 3). (A) Lysates of HBEC cell lines, SCLC and NSCLC immunoblotted for NCAM and TrkB. (B and C) Lysates of cells in which NeuroD1 was stably knocked down were blotted for NCAM (B) and TrkB (C). Loading control for H69 is GAPDH, and loading control for H2171 is  $\alpha$ -tubulin. (D) Knockdown of TrkB was quantified by qRT-PCR. (E) Knockdown of NCAM was quantified by immunoblotting. (F) HBEC3KT and HBEC30KT were transfected with a plasmid encoding TrkB or control vector. Cell lysates were immunoblotted for TrkB and for GAPDH as loading control. (G) H69, H82, and H1155 cell lines were transfected with siRNA oligonucleotides or shRNA vectors against NeuroD1 and NeuroD1/TrkB. Knockdown cells were subjected to overexpression of either NeuroD1 or TrkB mammalian expression vectors. Cells were subjected to migration experiments and lysed and immunoblotted for NeuroD1, TrkB, and GAPDH as loading control.
